# Supplementary material for: Sex differences in clinical trials of ALRV5XR treatment of androgenetic alopecia and telogen effluvium
Source: Frontiers journal article supplement (doi:10.3389/fmed.2022.918058), 2022-08-04
Supplement: Table_1.pdf [file Table_1.pdf]

# SUPPLEMENTARY MATERIALS

## Article Title

### **Sex differences in clinical trials of ALRV5XR treatment of androgenetic alopecia and telogen effluvium**

**Peter R Feldman<sup>1</sup>, Oriel J Feldman<sup>1,2</sup>, Jaime Guevara-Aguirre<sup>3,4,5,6</sup>, Klaus M Fiebig<sup>1</sup>**

<sup>1</sup>Arbor Life Labs, Toronto, Ontario, Canada

<sup>2</sup>Faculty of Science, Wilfrid Laurier University, Waterloo, Ontario, Canada

<sup>3</sup>College of Medicine, Universidad San Francisco de Quito (USFQ), Quito, Ecuador

<sup>4</sup>Faculty of Health, Medicine and Life Sciences, Maastricht University, Maastricht, The Netherlands

<sup>5</sup>Institute of Endocrinology, Metabolism, and Reproduction (IEMYR), Quito, Ecuador

<sup>6</sup>College of Medicine, University of Florida, Gainesville, Florida, USA

#### **\* Correspondence:**

Corresponding Author: Peter R Feldman  
[petefeldman@gmail.com](mailto:petefeldman@gmail.com)

Accepted: 13 July 2022

#### **Contents:**

Table S1. Baseline Characteristics

Table S2. Response Rates as Change in Terminal Hairs from Baseline.

Table S3. ALRV5XR Material Active Ingredients

**Table S1. Baseline Characteristics**

|                                              | Men                              |                                  | Women                            |                                  |
|----------------------------------------------|----------------------------------|----------------------------------|----------------------------------|----------------------------------|
|                                              | Placebo<br>N=23(11) <sup>a</sup> | ALRV5XR<br>N=23(11) <sup>a</sup> | Placebo<br>N=21(21) <sup>a</sup> | ALRV5XR<br>N=20(18) <sup>a</sup> |
| <b>Sex</b>                                   |                                  |                                  |                                  |                                  |
| Male                                         | 23 (100%)                        | 23 (100%)                        | 0 (0%)                           | 0 (0%)                           |
| Female                                       | 0 (0%)                           | 0 (0%)                           | 21 (100%)                        | 20 (100%)                        |
| <b>Age (years)</b>                           |                                  |                                  |                                  |                                  |
| Mean ( $\pm$ SD)                             | 45.7 ( $\pm$ 12.9)               | 48.3 ( $\pm$ 7.9)                | 51.6 ( $\pm$ 10.7)               | 50.1 ( $\pm$ 9.1)                |
| Median (IQR)                                 | 48.0 (34.0 – 54.3)               | 47.0 (45.5 – 52.5)               | 48.0 (33.0 – 52.0)               | 47.0 (45.5 – 57.8)               |
| Range                                        | 22 – 65                          | 32 – 63                          | 25 – 64                          | 24 – 62                          |
| <b>Anthropometrics</b>                       |                                  |                                  |                                  |                                  |
| Height (cm) <sup>b</sup>                     | 172.7 (170.3 – 185.5)            | 175.3 (170.5 – 177.8)            | 158.8 (157.5 – 160.0)            | 160.3 (154.8 – 165.0)            |
| Weight (kg) <sup>b</sup>                     | 80.2 (69.3 – 90.8)               | 81.4 (73.7 – 93.6)               | 63.6 (58.1 – 72.3)               | 60.1 (55.6 – 73.9)               |
| BMI (kg/m <sup>2</sup> ) <sup>b</sup>        | 25.1 (22.6 – 31.2)               | 27.1 (23.7 – 31.8)               | 25.3 (21.6 – 31.3)               | 24.4 (21.7 – 27.2)               |
| BP (mmHg)                                    | 128.3/84.1 ( $\pm$ 13.5/9.9)     | 128.1/84.4 ( $\pm$ 21.5/17.9)    | 118.1/74.7 ( $\pm$ 10.8/5.7)     | 118.8/76.5 ( $\pm$ 8.3/7.0)      |
| <b>Trichometry</b>                           |                                  |                                  |                                  |                                  |
| Terminal Hair Density (per cm <sup>2</sup> ) | 148.7 ( $\pm$ 69.5)              | 140.2 ( $\pm$ 71.4)              | 141.6 ( $\pm$ 32.5)              | 145.8 ( $\pm$ 32.9)              |
| Vellus Hair Density (per cm <sup>2</sup> )   | 127.5 ( $\pm$ 57.9)              | 134.3 ( $\pm$ 70.4)              | 47.9 ( $\pm$ 22.6)               | 33.4 ( $\pm$ 21.1)               |
| Terminal/Vellus Hair Ratio                   | 1.1                              | 1.5                              | 3.5                              | 5.6                              |
| Diameter of All Hair ( $\mu$ m)              | 44.7 ( $\pm$ 8.3)                | 40.9 ( $\pm$ 7.0)                | 56.2 ( $\pm$ 7.9)                | 66.3 ( $\pm$ 7.6)                |
| Diameter of Terminal Hair ( $\mu$ m)         | 55.1 ( $\pm$ 7.0)                | 53.3 ( $\pm$ 6.9)                | 65.3 ( $\pm$ 7.3)                | 73.6 ( $\pm$ 6.7)                |
| Growth Rate ( $\mu$ m/24 hours)              | 225.2 ( $\pm$ 45.1)              | 237.8 ( $\pm$ 49.7)              | 312.0 ( $\pm$ 32.1)              | 302.3 ( $\pm$ 33.6)              |
| Shed Rate (Hairs/24 hours) <sup>c</sup>      | 411.0 ( $\pm$ 183.0)             | 513.7 ( $\pm$ 286.2)             | 131.2 ( $\pm$ 44.0)              | 125.7 ( $\pm$ 50.0)              |
| <b>Diagnosis</b>                             |                                  |                                  |                                  |                                  |
| AGA Primary                                  | 23 (100%)                        | 23 (100%)                        | 11 (52%)                         | 16 (80%)                         |
| AGA Secondary                                | 0 (0%)                           | 0 (0%)                           | 10 (48%)                         | 4 (20%)                          |
| TE Primary                                   | 0 (0%)                           | 0 (0%)                           | 10 (48%)                         | 4 (20%)                          |
| TE Secondary                                 | 0 (0%)                           | 1 (4.3%)                         | 5 (24%)                          | 4 (20%)                          |
| <b>HN / Ludwig Classification</b>            |                                  |                                  |                                  |                                  |
| I / I-1                                      | 4 (17%)                          | 0 (0%)                           | 3 (14%)                          | 2 (10%)                          |
| II / I-2                                     | 2 (9%)                           | 1 (4%)                           | 4 (19%)                          | 11 (55%)                         |
| IIA / I-3                                    | 2 (9%)                           | 1 (4%)                           | 9 (43%)                          | 5 (25%)                          |
| III / I-4                                    | 1 (4%)                           | 0 (0%)                           | 1 (5%)                           | 1 (5%)                           |
| IIIA / II-2                                  | 0 (0%)                           | 1 (4%)                           | 0 (0%)                           | 1 (5%)                           |
| IIIV                                         | 5 (22%)                          | 6 (26%)                          |                                  |                                  |
| IV                                           | 1 (4%)                           | 4 (17%)                          |                                  |                                  |
| V                                            | 0 (0%)                           | 1 (4%)                           |                                  |                                  |
| VA                                           | 3 (13%)                          | 2 (9%)                           |                                  |                                  |
| VI                                           | 1 (4%)                           | 0 (0%)                           |                                  |                                  |
| VII                                          | 2 (9%)                           | 3 (13%)                          |                                  |                                  |
| Missing                                      | 2 (9%)                           | 4 (17%)                          | 4 (19%)                          | 0 (0%)                           |
| <b>Fitzpatrick Skin Type</b>                 |                                  |                                  |                                  |                                  |
| I                                            | 3 (13%)                          | 1 (4%)                           | 3 (14%)                          | 4 (20%)                          |
| II                                           | 3 (13%)                          | 2 (9%)                           | 8 (38%)                          | 8 (40%)                          |
| III                                          | 10 (44%)                         | 15 (65%)                         | 7 (33%)                          | 8 (40%)                          |
| IV                                           | 2 (9%)                           | 1 (4%)                           | 2 (10%)                          | 0 (0%)                           |
| V                                            | 2 (9%)                           | 1 (4%)                           | 0 (0%)                           | 0 (0%)                           |
| VI                                           | 2 (9%)                           | 3 (13%)                          | 1 (5%)                           | 0 (0%)                           |
| Unknown                                      | 1 (4%)                           | 0 (0%)                           | 0 (0%)                           | 0 (0%)                           |
| <b>Ethnicity</b>                             |                                  |                                  |                                  |                                  |
| African American                             | 4 (17%)                          | 4 (17%)                          | 0 (0%)                           | 0 (0%)                           |
| Caucasian                                    | 10 (44%)                         | 7 (30%)                          | 3 (14%)                          | 1 (5%)                           |
| Chinese                                      | 5 (24%)                          | 6 (26%)                          | 12 (57%)                         | 13 (65%)                         |
| Filipino                                     | 0 (0%)                           | 1 (4%)                           | 0 (0%)                           | 1 (5%)                           |
| Hispanic                                     | 1 (4%)                           | 3 (13%)                          | 4 (19%)                          | 3 (15%)                          |
| Indian                                       | 1 (4%)                           | 0 (0%)                           | 0 (0%)                           | 0 (0%)                           |
| Japanese                                     | 0 (0%)                           | 0 (0%)                           | 2 (10%)                          | 1 (5%)                           |
| Korean                                       | 1 (4%)                           | 0 (0%)                           | 0 (0%)                           | 0 (0%)                           |
| Mongolian                                    | 0 (0%)                           | 1 (4%)                           | 0 (0%)                           | 1 (5%)                           |
| Thai                                         | 0 (0%)                           | 1 (4%)                           | 0 (0%)                           | 0 (0%)                           |
| Vietnamese                                   | 1 (4%)                           | 0 (0%)                           | 0 (0%)                           | 0 (0%)                           |

**Legend:** a: Evaluable for Hair Efficacy (Per Protocol); b: Median (IQR);  $\pm$  or SD=standard deviation; c: Scalp Shed Rate based on 700cm<sup>2</sup> shedding assumed uniformly from phototrichogram area on vertex; Trichometry measures are per protocol; AGA: Androgenetic Alopecia; TE: Telogen Effluvium HN: Hamilton-Norward classification of hair loss pattern for men. Ludwig classification of hair loss pattern for women. Vellus hair includes true vellus hair, vellus-like and new hair.

**Table S2. Response Rates as Change in Terminal Hairs from Baseline.** This table shows the stratified response by treatment group with a substantial increase in response in hair growth in the ALRV5XR groups over time. **In Women**, the ALRV5XR group's change in terminal hair (TH) /cm<sup>2</sup> shows a bimodal responder pattern of non-responders and very high responders with a significant shift of responding subjects' hair count changes from a relatively even distribution in women of 0-40 TH/cm<sup>2</sup> at week 12 to higher values of 30 THs/cm<sup>2</sup> and above at week 24. Response Rates by % Change in THs for the ALRV5XR treatment group show a significant shift of subjects' hair % changes at week 12 to higher percentage ranges at week 24. **In Men**, the ALRV5XR group separates into a trimodal responder pattern of low, moderate, and high responders when measured by absolute changes in TH density; however, percent changes in TH density are more uniform. 54·5% of the ALRV5XR group increased their TH density by 10 or more THs/cm<sup>2</sup> by week 24 and 18·2% of the group increased their TH density by more than 25 THs/cm<sup>2</sup>. Overall, men have a perfect response rate, while women grow significantly more hair than men.

|                                | Men     |         |         |         | Women   |         |         |         |       |
|--------------------------------|---------|---------|---------|---------|---------|---------|---------|---------|-------|
|                                | Placebo |         | ALRV5XR |         | Placebo |         | ALRV5XR |         |       |
|                                | Week 12 | Week 24 | Week 12 | Week 24 | Week 12 | Week 24 | Week 12 | Week 24 |       |
| Positive Responders            | 50·0%   | 81·2%   | 91·9%   | 100%    | 67·7%   | 42·9%   | 77·8%   | 66·7%   |       |
| Terminal Hairs/cm <sup>2</sup> |         |         |         |         |         |         |         |         |       |
| <0                             | 50·0%   | 81·8%   | 9·1%    | -       | <0      | 33·3%   | 57·1%   | 22·2%   | 33·3% |
| 0-5                            | 40·0%   | 18·2%   | 27·3%   | 45·5%   | 0-10    | 47·6%   | 28·6%   | 16·7%   | -     |
| 5-10                           | 10·0%   | -       | 27·3%   | -       | 10-20   | 9·5%    | 4·8%    | 16·7%   | -     |
| 10-15                          | -       | -       | 18·2%   | 27·3%   | 20-30   | 9·5%    | -       | 16·7%   | -     |
| 15-20                          | -       | -       | 9·1%    | 9·1%    | 30-40   | -       | -       | 16·7%   | 5·6%  |
| 20-25                          | -       | -       | -       | -       | 40-50   | -       | 4·8%    | 11·1%   | 22·2% |
| ≥25                            | -       | -       | 9·1%    | 18·2%   | ≥50     | -       | 4·8%    | -       | 38·9% |
| Min Regrowth                   | -17     | -12     | -3      | 0       | -7      | -9      | -9      | -6      |       |
| Max Regrowth                   | 9       | 3       | 25      | 51      | 22      | 54      | 41      | 79      |       |
| Terminal Hairs %               |         |         |         |         |         |         |         |         |       |
| <0%                            | 50·0%   | 81·8%   | 9·1%    | 0·0%    | <0%     | 33·3%   | 57·1%   | 22·2%   | 33·3% |
| 0-5%                           | 40·0%   | 18·2%   | 45·5%   | 45·5%   | 0-10%   | 47·6%   | 28·6%   | 22·2%   | -     |
| 5-10%                          | 10·0%   | -       | 27·3%   | 9·1%    | 10-20%  | 9·5%    | 4·8%    | 33·3%   | 11·1% |
| 10-15%                         | -       | -       | -       | 18·2%   | 20-30%  | 9·5%    | -       | 16·7%   | 11·1% |
| 15-20%                         | -       | -       | -       | 9·1%    | 30-40%  | -       | 4·8%    | 5·6%    | 27·8% |
| 20-25%                         | -       | -       | 18·2%   | 9·1%    | 40-50%  | -       | 4·8%    | -       | 11·1% |
| ≥25%                           | -       | -       | -       | 9·1%    | ≥50%    | -       | -       | -       | 5·6%  |
| Min Regrowth                   | -12·1%  | -12·3%  | 3·4%    | 0%      | -5·3%   | -8·1%   | -6·0%   | -4·9%   |       |
| Max Regrowth                   | 7·0%    | 1·6%    | 22·9%   | 46·8%   | 18·3%   | 45·0%   | 36·3%   | 69·9%   |       |

**Table S3. ALRV5XR Material Active Ingredients**

| <b>Active Ingredients*</b> |                                                                                                                                                                                                                                                                                                                                                                                                                                           |
|----------------------------|-------------------------------------------------------------------------------------------------------------------------------------------------------------------------------------------------------------------------------------------------------------------------------------------------------------------------------------------------------------------------------------------------------------------------------------------|
| Oral (capsule)             | Angelica sinensis, Ascophyllum nodosum, Astragalus membranaceus, Coenzyme Q10, Copper, Eclipta prostrata, Folate, Ganoderma lucidum, Malus domestica, Moringa oleifera, Niacin, Pantothenic acid, Polygonum multiflorum, Punica granatum, Riboflavin, Rosmarinus officinalis, Scutellaria baicalensis, Selenium, Silicon, Sophora flavescens, Vitamin A, Vitamin B6, Vitamin B7(Biotin), Vitamin B12, Vitamin D, Vitis vinifera, and Zinc |
| Shampoo                    | Caffeine, Eclipta prostrata, Lupinus, Momordica charantia, Moringa oleifera, Pyrus malus, Rosmarinus officinalis, Vitis vinifera, Scutellaria baicalensis, Vitamin B7(Biotin)                                                                                                                                                                                                                                                             |
| Conditioner                | Caffeine, Eclipta prostrata, Lupinus, Momordica charantia, Moringa oleifera, Pyrus malus, Rosmarinus officinalis, Vitis vinifera, Scutellaria baicalensis, Vitamin B7(Biotin)                                                                                                                                                                                                                                                             |
| Follicle serum             | Caffeine, Eclipta prostrata, Lupinus, Momordica charantia, Moringa oleifera, Ocimum basilicum, Pisum sativum, Pyrus malus, Rosmarinus officinalis, Vitis vinifera, Scutellaria baicalensis, Vitamin B7(Biotin)                                                                                                                                                                                                                            |

\*Patents pending
